# Supplementary material
Source: Springer Nature journal article supplement (https://www.springermedizin.de/resource/supplementary/13034_2013_232_MOESM3_ESM.pdf/9652600)
Supplement: MOESM3 [file 9652600]

**Figure 3: Comparison of T-values in AIDA subscales between the diagnostic groups and the norm population (all T=50).**

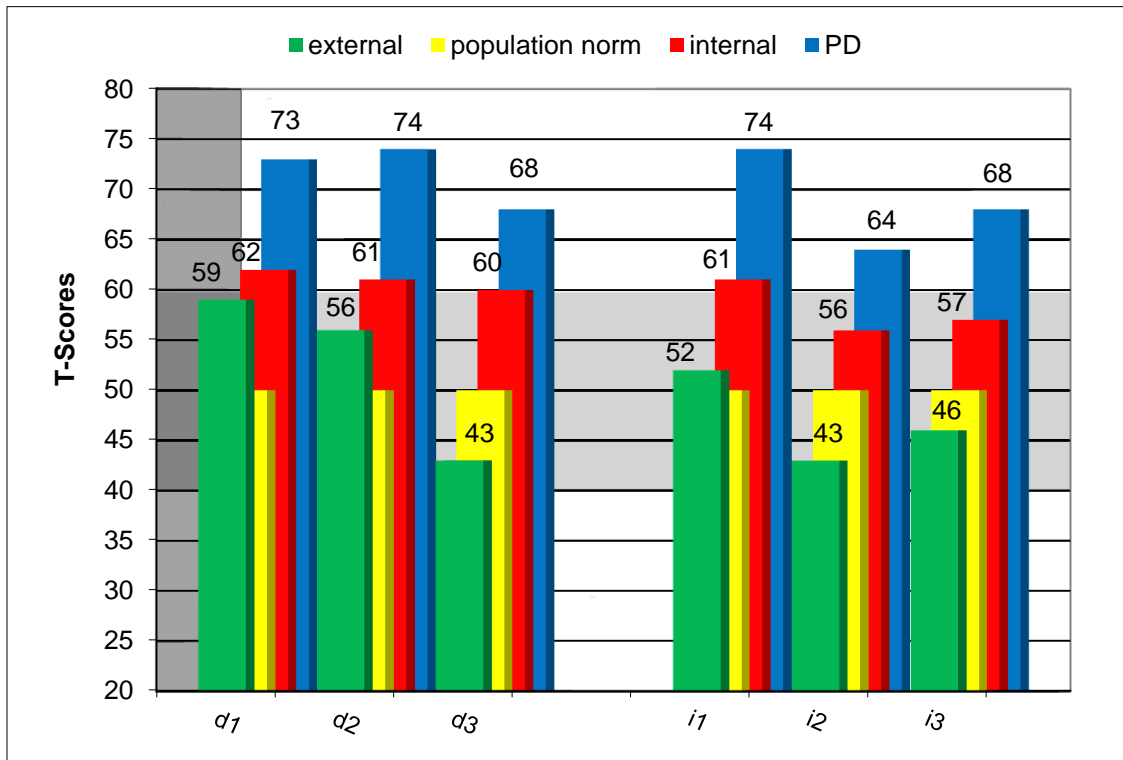

Figure 3: Comparison of T-values in AIDA subscales between the diagnostic groups and the norm population (all T=50). Legend: Discontinuity concerning attributes / goals (d1), relationships (d2), emotional self-reflection (d3) and Incoherence concerning consistent self (i1), autonomy (i2), cognitive self-reflection (i3)
